# Supplementary material for: Battery cost forecasting: a review of methods and results with an outlook to 2050
Source: Royal Society of Chemistry journal article supplement (doi:10.1039/d1ee01530c), 2021-01-01
Supplement: d1ee01530c1.xlsx [file d1ee01530c1.xlsx]

## Sheet: Fig. 2
Forecast ranges and parameter extracts (converted forecast level, converted currency)
Publication	Year	Method	Technology	Forecast item	Forecast level	Original currency	Minimum estimate ($ per kWh)	Parameter extract minimum	Maximum estimate ($ per kWh)	Parameter extract maximum
Baker et al.	2010	Expert elicitation	LIB	Cost	(Pack)	USD	232	2020, 70 million USD R&D funding per year for LIB	300	2020, no funding for LIB
Thiel et al.	2010	Technological learning	LIB	Cost	Pack	EUR	249.526	2030, BEV high sales scenario	795.654	2010, upper bound
Gerssen-Gondelach and Faaij	2012	Technological learning	LIB	Cost	Pack	USD	210	2020, low initial value, fast learning	990	2012, high initial value, slow learning
Gerssen-Gondelach and Faaij	2012	Literature-based projection	LSB	Cost	Pack	USD	250	Optimistic estimate	500	Pessimistic estimate
Gerssen-Gondelach and Faaij	2012	Literature-based projection	LAB	Cost	Pack	USD	300	Optimistic estimate	700	Pessimistic estimate
Weiss et al.	2012	Literature-based projection	LIB	Cost	Pack	EUR	128.587	2030	1543.05	2010 pessimistic estimate
Mayer et al.	2012	Technological learning	LIB	Cost	(Pack)	EUR	397.335	2020, fast learning, 3-year patent growth rate	1120	2010
Brodd and Helou	2012	Bottom-up modeling	LIB	Cost	Cell	USD	Energy-specific cost not reported
Catenacci et al.	2013	Expert elicitation	LIB	Cost	Pack	USD	200	2030 optimistic expert	750	2030 pessimistic expert
Gallagher et al.	2014	Bottom-up modeling	LIB	Cost	Pack	USD	95	LMR-NMC|SiC	267	NMC111|C
Gallagher et al.	2014	Bottom-up modeling	LAB	Cost	Pack	USD	70	High share of useable energy	200	Low share of useable energy
Patry et al.	2014	Bottom-up modeling	LIB	Cost	Cell	USD	304.974	NMC111|C, max. electrode thickness 100 microns	526.178	LFP|C, max. electrode thickness 50 microns
Nelson et al.	2015	Bottom-up modeling	LIB	Cost	Pack	USD	161	NMC441|C, large-scale dedicated plant	226	LMO|C, flex plant
Matteson and Williams (a)	2015	Technological learning	LIB	Price	(Pack)	USD	300	Target price	600	Initial level
Schuenemann	2015	Bottom-up modeling	LIB	Cost	Cell	EUR	226.569	Cathode thickness 88 microns	274.498	Cathode thickness 50 microns
Eroglu et al.	2015	Bottom-up modeling	LSB	Price	Pack	USD	80	High sulfur loading, optimized design	270	Low sulfur loading, baseline design
Nykvist and Nilsson	2015	Technological learning	LIB	Cost	Pack	USD	230	2018	410	2014
Hagen et al.	2015	Bottom-up modeling	LSB	Cost	Material	USD	122.326	High sulfur loading, high sulfur utilization	436.878	Low sulfur loading, low sulfur utilization
Matteson and Williams (b)	2015	Technological learning	LIB	Price	(Pack)	USD	70	100 TWh of cumulative production	600	100 GWh of cumulative production
Petri et al.	2015	Bottom-up modeling	LIB	Cost	Material	USD	181.185	LR-NMC|SiC	215.584	NMC|C
Sakti et al. (a)	2015	Bottom-up modeling	LIB	Cost	Pack	USD	200	Optimistic process and design	370	Pessimistic process and design
Berg et al.	2015	Bottom-up modeling	LIB	Cost	Cell	USD	250	LR-NMC|C	386.125	LCP|C
Berg et al.	2015	Bottom-up modeling	LSB	Cost	Cell	USD	201.178	Li2S|Li
Berg et al.	2015	Bottom-up modeling	LAB	Cost	Cell	USD	137.565	Li2O2|Li
Wood et al.	2015	Bottom-up modeling	LIB	Cost	Pack	USD	370.3	Optimized process & design	502.8	Baseline process & design
Ciez and Whitacre (a)	2016	Bottom-up modeling	LIB	Cost	Cell	USD	212.042	LMO|C, low Lithium price	295.811	NCA|C, high Lithium price
Cole et al.	2016	Literature-based projection	LIB	Cost	Pack	USD	64	2050, low cost projection	418	2016, high cost projection
Sakti et al. (b)	2017	Bottom-up modeling	LIB	Cost	Pack	USD	255	2018, optimistic parameters	1034	2014, pessimistic parameters
Sakti et al. (b)	2017	Expert elicitation	LIB	Cost	Pack	USD	273	2018, optimistic expert	1265	2014, pessimistic expert
Schmidt et al. (a)	2017	Technological learning	LIB	Price	Pack	USD	35.8249	2050, high experience rate	316.9	2017, low experience rate
Kittner et al.	2017	Technological learning	LIB	Price	Pack	USD	124.24	2020	178.41	2017
Berckmans et al.	2017	Bottom-up modeling	LIB	Cost	Pack	USD	293	NMC622|SiC	432	NMC622|C
Berckmans et al.	2017	Technological learning	LIB	Price	Pack	USD	50	2030, NMC622|SiC	466	2015, NMC622|C
Ciez and Whitacre (b)	2017	Bottom-up modeling	LIB	Cost	Cell	USD	213.351	LMO|C, cylindrical, baseline material prices	574.607	LMO|C, prismatic, high material prices
Cano et al.	2018	Literature-based projection	LIB	Cost	Pack	USD	70	Lower bound of sources	250	Upper bound of sources
Cano et al.	2018	Literature-based projection	LSB	Cost	Pack	USD	36	Lower bound of sources	130	Upper bound of sources
Cano et al.	2018	Literature-based projection	LAB	Cost	Pack	USD	70	Lower bound of sources	200	Upper bound of sources
Few et al.	2018	Expert elicitation	LIB	Cost	Pack	USD	20	2030, optimistic expert, lower bound	657	2020, pessimistic expert, upper bound
Vaalma et al.	2018	Bottom-up modeling	LIB	Cost	Pack	USD	234	NMC622|SiC	259	LMO|C
Schmuch et al.	2018	Bottom-up modeling	LIB	Cost	Stack	USD	103.508	LMR-NMC|SiC	160.335	NMC622|C
Schmuch et al.	2018	Bottom-up modeling	SSB	Cost	Stack	USD	119.744	Low Li foil cost, low Li excess	257.754	High Li foil cost, high Li excess
Edelenbosch et al.	2018	Technological learning	LIB	Cost	Pack	USD	89.7368	2050, optimistic	297.252	2018, reference
Safoutin et al.	2018	Bottom-up modeling	LIB	Cost	Pack	USD	120	2025, large vehicle BEV size	150	2025, small BEV size
Nykvist et al.	2019	Technological learning	LIB	Cost	Pack	USD	43	2030, low estimate	218	2019, high estimate
Schmidt et al. (b)	2019	Technological learning	LIB	Price	Pack	USD	23.2964	2050, fast learning	214.944	2019, slow learning
Philippot et al.	2019	Bottom-up modeling	LIB	Price	Pack	USD	173.511	Poland	201.496	Korea
Wentker et al.	2019	Bottom-up modeling	LIB	Cost	Material	USD	113.588	LNMO|C	153.781	NMC111|C
Hsieh et al.	2019	Technological learning	LIB	Price	Pack	USD	93	2030, constant raw material prices	219	2019
Schnell et al. (a)	2019	Bottom-up modeling	SSB	Cost	Cell	USD	157.068	HE-NMC, high cathode thickness, low LLZ price	543.193	LMNO, low cathode thickness, high LLZ price
Comello and Reichelstein	2019	Literature-based projection	LIB	Price	Pack	USD	86	2023, low scenario	200	2019, high scenario
Zhou et al.	2019	Technological learning	LIB	Price	Pack	USD	100	2.5 TWh cumulative production	175	0.5 TWh cumulative production
Schneider et al.	2019	Bottom-up modeling	LIB	Cost	Cell	USD	243.455	NMC111|C
Schnell et al. (b)	2020	Bottom-up modeling	LIB	Cost	Cell	USD	140.052	NMC811|SiC	155.366	NMC811|C
Schnell et al. (b)	2020	Bottom-up modeling	SSB	Cost	Cell	USD	112.565	Sulfide SSB, low LPS price	349.476	Oxide SSB, high LLZ price
Ciez and Steingart	2020	Bottom-up modeling	LIB	Cost	Cell	USD	137.434	Low material prices	235.602	High material prices
Duffner et al. (a)	2020	Bottom-up modeling	LIB	Cost	Cell	USD	119.764	Bulgaria	128.141	Denmark
Yan and Obrovac	2020	Bottom-up modeling	LIB	Cost	Pack	USD	147.2	NMC111|C
Mongird et al.	2020	Literature-based projection	LIB	Cost	Pack	USD	189	2025	271	2018
Nemeth et al.	2020	Bottom-up modeling	LIB	Price	Cell	USD	85	NMC111|C, 100 GWh plant capacity	220	NMC111|LTO, 10 GWh plant capacity
Beuse et al.	2020	Technological learning	LIB	Price	Pack	USD	107	2030, LFP|C	316	2017
Penisa et al.	2020	Technological learning	LIB	Price	Pack	USD	84	2025	151	2020
He et al.	2020	Literature-based projection	LIB	Cost	Pack	USD	67	2050, low scenario	154	2020, high scenario
Duffner et al. (b)	2021	Bottom-up modeling	LIB	Cost	Cell	USD	83.7696	NMC811|C, optimized process	138.743	NMC622, baseline process
Mauler et al.	2021	Bottom-up modeling	LIB	Cost	Cell	USD	98.1675	NCA|C, plant size 14 GWh	189.79	LFP|C, plant size 1 GWh

## Sheet: Fig. 3, 5, 6
Time-specific forecast values (converted forecast level, converted currency)
Publication	Year published	Method	Technology	Forecast item	Forecast level	Original currency	Scenario	Unit		2010	2011	2012	2013	2014	2015	2016	2017	2018	2019	2020	2021	2022	2023	2024	2025	2026	2027	2028	2029	2030	2031	2032	2033	2034	2035	2036	2037	2038	2039	2040	2041	2042	2043	2044	2045	2046	2047	2048	2049
Baker et al.	2010	Expert elicitation	LIB	Cost	(Pack)	USD	Minimum	$ per kWh												232
Baker et al.	2010	Expert elicitation	LIB	Cost	(Pack)	USD	Average	$ per kWh												265
Baker et al.	2010	Expert elicitation	LIB	Cost	(Pack)	USD	Maximum	$ per kWh												300
Thiel et al.	2010	Technological learning	LIB	Cost	Pack	EUR	Minimum	$ per kWh		795.654										341.91										264.61
Thiel et al.	2010	Technological learning	LIB	Cost	Pack	EUR	Average	$ per kWh		795.654										341.91										257.068
Thiel et al.	2010	Technological learning	LIB	Cost	Pack	EUR	Maximum	$ per kWh		795.654										341.91										249.526
Gerssen-Gondelach and Faaij	2012	Technological learning	LIB	Cost	Pack	USD	Minimum	$ per kWh		800		538			323	292	262	246	226	210
Gerssen-Gondelach and Faaij	2012	Technological learning	LIB	Cost	Pack	USD	Average	$ per kWh		1000		746.25			519	481.75	450.25	426.75	405	387
Gerssen-Gondelach and Faaij	2012	Technological learning	LIB	Cost	Pack	USD	Maximum	$ per kWh		1200		990			759	718	687	656	636	615
Weiss et al.	2012	Literature-based projection	LIB	Cost	Pack	EUR	Minimum	$ per kWh		642.937										257.175										128.587
Weiss et al.	2012	Literature-based projection	LIB	Cost	Pack	EUR	Average	$ per kWh		1092.99										411.48										128.587
Weiss et al.	2012	Literature-based projection	LIB	Cost	Pack	EUR	Maximum	$ per kWh		1543.05										565.785										128.587
Mayer et al.	2012	Technological learning	LIB	Cost	(Pack)	EUR	Minimum	$ per kWh		1120										397.335
Mayer et al.	2012	Technological learning	LIB	Cost	(Pack)	EUR	Medium learning, 3 year patent growth	$ per kWh		1120										419.195
Mayer et al.	2012	Technological learning	LIB	Cost	(Pack)	EUR	Maximum	$ per kWh		1120										524.637
Catenacci et al.	2013	Expert elicitation	LIB	Cost	Pack	USD	Minimum	$ per kWh				500																		200
Catenacci et al.	2013	Expert elicitation	LIB	Cost	Pack	USD	Average	$ per kWh				500																		411.75
Catenacci et al.	2013	Expert elicitation	LIB	Cost	Pack	USD	Maximum	$ per kWh				500																		750
Matteson and Williams (a)	2015	Technological learning	LIB	Price	(Pack)	USD	Based on public subsidies	$ per kWh
Nykvist and Nilsson	2015	Technological learning	LIB	Cost	Pack	USD	EV	$ per kWh						410				230
Matteson and Williams (b)	2015	Technological learning	LIB	Price	(Pack)	USD	Based on cumulative capacity	$ per kWh
Cole et al.	2016	Literature-based projection	LIB	Cost	Pack	USD	Minimum	$ per kWh								380	336	294	249	209	188	169	154	135	119	109	101	96	85	78	76	75	74	73	72	72	71	70	69	68	68	68	67	66	66	66	65	64	64
Cole et al.	2016	Literature-based projection	LIB	Cost	Pack	USD	Mid cost projection	$ per kWh								395	367	340	311	281	271	255	248	233	221	218	214	209	206	200	198	196	194	192	190	189	188	187	186	185	183	182	180	179	178	176	175	173	171
Cole et al.	2016	Literature-based projection	LIB	Cost	Pack	USD	Maximum	$ per kWh								418	413	406	400	395	384	372	361	350	338	328	318	312	298	290	288	285	282	280	278	277	276	276	276	275	273	271	268	266	264	261	260	258	256
Sakti et al. (b)	2017	Expert elicitation	LIB	Cost	Pack	USD	Minimum	$ per kWh					362					273
Sakti et al. (b)	2017	Expert elicitation	LIB	Cost	Pack	USD	Average	$ per kWh					643.8					420.333
Sakti et al. (b)	2017	Expert elicitation	LIB	Cost	Pack	USD	Maximum	$ per kWh					1265					744
Schmidt et al. (a)	2017	Technological learning	LIB	Price	Pack	USD	Minimum	$ per kWh									307.37	284.572	261.474	238.751	216.933	196.39	177.345	159.903	144.086	129.861	117.162	105.906	95.9992	87.3447	79.8399	73.3783	67.8489	63.1381	59.1335	55.7279	52.8236	50.3348	48.1886	46.3243	44.6924	43.2526	41.9728	40.8268	39.7937	38.8565	38.0014	37.2171	36.4942
Schmidt et al. (a)	2017	Technological learning	LIB	Price	Pack	USD	Central experience rate	$ per kWh									312	294	275	256	238	220	204	188	173	160	148	136	126	117	109.547	102.597	96.5403	91.2929	86.763	82.8566	79.483	76.5589	74.0113	72	69.806	68.0531	66.4839	65.0697	63.7873	62.6174	61.5445	60.5557	59.6401
Schmidt et al. (a)	2017	Technological learning	LIB	Price	Pack	USD	Maximum	$ per kWh									316.9	303.671	289.775	275.558	261.327	247.33	233.757	220.742	208.38	196.733	185.844	175.742	166.447	157.969	150.308	143.45	137.365	132.003	127.302	123.192	119.597	116.446	113.672	111.217	109.031	107.074	105.309	103.708	102.248	100.908	99.6734	98.5297	97.4661
Kittner et al.	2017	Technological learning	LIB	Price	Pack	USD	EV/ES pack	$ per kWh									178.41	157.5	139.8	124.24
Berckmans et al.	2017	Technological learning	LIB	Price	Pack	USD	Minimum	$ per kWh							317					131					78					50
Berckmans et al.	2017	Technological learning	LIB	Price	Pack	USD	Average	$ per kWh							391.5					162					96.5					63
Berckmans et al.	2017	Technological learning	LIB	Price	Pack	USD	Maximum	$ per kWh							466					193					115					76
Cano et al.	2018	Literature-based projection	LIB	Cost	Pack	USD	No time-specific forecast	$ per kWh
Few et al.	2018	Expert elicitation	LIB	Cost	Pack	USD	Minimum	$ per kWh												50										20
Few et al.	2018	Expert elicitation	LIB	Cost	Pack	USD	Average, 50th percentile, all factors	$ per kWh												269.387										176.72
Few et al.	2018	Expert elicitation	LIB	Cost	Pack	USD	Maximum	$ per kWh												657										511
Edelenbosch et al.	2018	Technological learning	LIB	Cost	Pack	USD	Minimum	$ per kWh										151.959	134.955	123.636	116.598	114.518	111.866	110.764	108.558	106.145	104.296	102.547	100.379	99.8095	99.5694	99.1346	97.9952	98.1311	97.7561	97.3284	96.0099	95.5446	94.6766	94.65	94.1809	93.7071	93.2284	92.7449	92.2564	91.7629	91.2642	90.7604	90.2513
Edelenbosch et al.	2018	Technological learning	LIB	Cost	Pack	USD	Average	$ per kWh										200.39	185.762	176.811	170.518	168.119	165.53	163.519	161.589	159.579	157.746	155.936	153.973	152.548	152.378	152.143	151.671	151.625	151.407	151.121	150.537	150.236	149.799	149.642	149.482	149.322	149.159	148.995	148.829	148.637	148.444	148.248	148.051
Edelenbosch et al.	2018	Technological learning	LIB	Cost	Pack	USD	Maximum	$ per kWh										297.252	287.376	277.25	265.776	261.032	256.29	251.736	248.535	245.304	242.042	238.75	235.427	232.119	231.727	231.332	230.932	230.529	230.122	229.686	229.246	228.802	228.353	227.9	227.884	227.869	227.853	227.837	227.821	227.732	227.642	227.552	227.461
Nykvist et al.	2019	Technological learning	LIB	Cost	Pack	USD	Minimum	$ per kWh											125	110	98	88	80	73	67	61	56	52	47	43
Nykvist et al.	2019	Technological learning	LIB	Cost	Pack	USD	Best cost estimate, average learning rate	$ per kWh											165	150	137	125	116	109	100	94	88	82	77	72
Nykvist et al.	2019	Technological learning	LIB	Cost	Pack	USD	Maximum	$ per kWh											218	214	190	179	169	160	152	144	137	131	125	119
Schmidt et al. (b)	2019	Technological learning	LIB	Price	Pack	USD	Minimum	$ per kWh											185.231	165.384	149.572	136.163	124.297	113.497	103.511	94.221	85.5939	77.6423	70.396	63.8805	58.1037	53.0495	48.6778	44.929	41.7316	39.0097	36.6898	34.7049	32.997	31.5174	30.2258	29.0897	28.0828	27.184	26.376	25.6452	24.9802	24.3719	23.8127
Schmidt et al. (b)	2019	Technological learning	LIB	Price	Pack	USD	Central experience rate	$ per kWh											198	181	168	156	145	135	125	116	108	100	92	86	79.3962	73.8894	69.0368	64.8023	61.1317	57.9601	55.22	52.8467	50.7817	49	47.3823	45.9699	44.7085	43.5743	42.5481	41.6142	40.7595	39.9735	39.2473
Schmidt et al. (b)	2019	Technological learning	LIB	Price	Pack	USD	Maximum	$ per kWh											214.944	202.353	192.048	183.131	175.087	167.598	160.46	153.548	146.793	140.168	133.681	127.366	121.27	115.449	109.955	104.834	100.115	95.8135	91.9285	88.444	85.3332	82.5626	80.0958	77.8963	75.9296	74.1646	72.5738	71.1332	69.8225	68.6243	67.5239
Hsieh et al.	2019	Technological learning	LIB	Price	Pack	USD	Minimum	$ per kWh											195	174	162	148	138	129	120	112	107	102	98	93
Hsieh et al.	2019	Technological learning	LIB	Price	Pack	USD	Base case	$ per kWh											209	191	176	165	155	149	143	138	132	128	126	124
Hsieh et al.	2019	Technological learning	LIB	Price	Pack	USD	Maximum	$ per kWh											219	200	186	178	166	162	155	151	148	145	145	141
Comello and Reichelstein	2019	Literature-based projection	LIB	Price	Pack	USD	Minimum	$ per kWh											140	124	110	97	86
Comello and Reichelstein	2019	Literature-based projection	LIB	Price	Pack	USD	Average scenario	$ per kWh											171.04	157.08	144.271	132.616	122.004
Comello and Reichelstein	2019	Literature-based projection	LIB	Price	Pack	USD	Maximum	$ per kWh											200	190	181	173	164
Zhou et al.	2019	Technological learning	LIB	Price	Pack	USD	Based on cumulative production	$ per kWh
Mongird et al.	2020	Literature-based projection	LIB	Cost	Pack	USD	LIB, pack	$ per kWh										271							189
Beuse et al.	2020	Technological learning	LIB	Price	Pack	USD	Minimum	$ per kWh									316													110
Beuse et al.	2020	Technological learning	LIB	Price	Pack	USD	Average	$ per kWh									316													133.5
Beuse et al.	2020	Technological learning	LIB	Price	Pack	USD	Maximum	$ per kWh									316													157
Penisa et al.	2020	Technological learning	LIB	Price	Pack	USD	2-factor, statistically sound	$ per kWh												151	132	117	105	92	84
He et al.	2020	Literature-based projection	LIB	Cost	Pack	USD	Minimum	$ per kWh												146	137	128	121	114	107	102	96	92	87	83	80	77	75	74	73	72.2	71.4	70.6	69.8	69	68.8	68.6	68.4	68.2	68	67.8	67.6	67.4	67.2
He et al.	2020	Literature-based projection	LIB	Cost	Pack	USD	Reference scenario	$ per kWh												147	142	136	132	127	123	118	115	111	107	104	101	98	95	93	91	89.3	87.6	85.9	84.2	82.6	81.7	81	80.3	79.6	78.7	78	77.3	76.6	75.8
He et al.	2020	Literature-based projection	LIB	Cost	Pack	USD	Maximum	$ per kWh												154	151	148	145	142	139	136	133	130	127	124	123.3	122.6	121.9	121.2	120.5	119.8	119.1	118.4	117.7	117	116.3	115.6	114.9	114.2	113.5	112.8	112.1	111.4	110.7
[truncated: 1 more columns]

## Sheet: Fig. 4
Technological learning analysis
			Learning rate (battery market)						Market growth
Publication	Year published	Type	Lower boundary	Upper boundary	Central learning rate	Source	Learning rate based on		Base year	Initial market volume	Forecast horizon of analysis	Expected market volume	Source	Compound annual growth rate in forecasting period
Thiel et al.	2010	Battery-specific			0.1	Table 2, battery	Hyways (2002)		2010	3.55	2030	2430.45	Table 2	0.386031
Gerssen-Gondelach and Faaij	2012	Battery-specific	0.09	0.17	0.13	Figure 3	1993-2004		2010	1.25	2020	177.5	Article text, p. 117	0.641454
Mayer et al.	2012	Battery-specific			0.08	article text, p. 14470	1991-2005		2010	4.2	2020	44.2	Table 6	0.265369
Nykvist and Nilsson	2015	Battery-specific			0.09	article text, p. 329	2006-2014		2014		2018		Article text, p. 330	1
Schmidt et al.	2017	Battery-specific			0.159	Figure 1, LIB EV	2010-2016		2017	59.4273	2030	2936.47	Supplementary Materials, Figure 3, LIB EV	0.349881
Kittner et al.	2017	Battery-specific			0.169	article text, p. 2	1991-2015		2017	71800	2020	101100	Supplementary Materials, Table 13, Base case	0.120836
Berckmans et al.	2017	General			0.235	article text, p. 14	1984		2015	0.7	2030	36.3	Table 8	0.30113
Edelenbosch et al.	2018
Nykvist et al.	2019	Battery-specific			0.168	article text, p. 146	Schmidt et al. (2017), Kittner et al. (2017)		2016	52.56	2030	3900	Article text p. 146. sources traced back (International Energy Agency 2017), multiplied by battery sizes Supplementary Materials, measured from Figure A3	0.360193
Schmidt et al.	2019	Battery-specific			0.191	Supplementary materials, Data, LIB EV	2010-2017		2019	230.378	2030	3576.58	Supplementary Materials, Figure 3, LIB EV	0.283143
Hsieh et al.	2019	Battery-specific			0.165	article text, p. 220	2010-2016		2019	111	2030	5545	Measured from Figure 5	0.426975
Beuse et al.	2020	Battery-specific			0.208	Supplementary materials, Sheet Experience curves	2010-2017						Supplementary Materials, Sheet Market forecasts	0.2
Penisa et al.	2020	Battery-specific			0.2118	Article text, p. 7, Appendix Table A1	2007-2019						Appendix Table A2	0.11

## Sheet: Fig. 7 LIB
Technology-specific forecast values (LIB)
	Unit						SM kaufen																				SM kaufen
Publication		Patry et al.	Nelson et al.	Petri et al.	Berg et al.	Ciez and Whitacre (a)	Sakti et al. (b)	Ciez and Whitacre (b)	Vaalma et al.	Wentker et al.	Ciez and Steingart	Berg et al.	Berg et al.	Wentker et al.	Beuse et al.	Berg et al.	Patry et al.	Petri et al.	Berg et al.	Wentker et al.	Beuse et al.	Mauler et al.	Beuse et al.	Patry et al.	Berg et al.	Ciez and Whitacre (a)	Ciez and Whitacre (b)	Schmuch et al.	Philippot et al.	Wentker et al.	Mauler et al.	Beuse et al.	Sakti et al. (b)	Gallagher et al.	Patry et al.	Schünemann	Petri et al.	Sakti et al. (a)	Berg et al.	Wood et al.	Wentker et al.	Schneider et al.	Nemeth et al.	Nemeth et al.	Nelson et al.	Wentker et al.	Wentker et al.	Berckmans et al.	Berckmans et al.
Year published		2014	2015	2015	2015	2016	2017	2017	2018	2019	2020	2015	2015	2019	2020	2015	2014	2015	2015	2019	2020	2021	2020	2014	2015	2016	2017	2018	2019	2019	2021	2020	2017 (2017	2014	2014	2015	2015	2015	2015	2015	2019	2019	2020	2020	2015	2019	2019	2017	2017
Technology
Cathode active material		LMO	LMO	LMO	LMO	LMO	LMO	LMO	LMO	LMO	LMO	LCP	LNMO	LNMO	LNMO	LCO	LFP	LFP	LFP	LFP	LFP	LFP	LMFP	NCA	NCA	NCA	NCA	NCA	NCA	NCA	NCA	NCA	NMC (unspecified)	NMC111	NMC111	NMC111	NMC	NMC111	NMC111	NMC	NMC111	NMC111	NMC111	NMC111	NMC441	NMC442	NMC532	NMC622	NMC622
Anode active material		C	C	C	C	C	C	C	C	C	C	C	C	C	C	C	C	C	C	C	C	C	C	C	C	C	C	C	C (2% Si)	C	C	C	C	C	C	C	C	C	C	C	C	C	C	LTO	C	C	C	C	Si alloy
Design
Cathode thickness	microns	max. 50-100	100	n/a	100	n/a	80-100	70-200	max. 100	65	100	100	100	65	n/a	104	max. 50-100	n/a	100	65	n/a	65	n/a	Max. 50-100	89	n/a	70-200	65	n/a	65	65	n/a	80-90	max. 100-200	max. 50-100	50-88	n/a	max. 100-200	97	50-100	65	n/a	n/a	n/a	100	65	65	n/a	n/a
Anode thickness	microns	max. 50-100	61	n/a	73	n/a	n/a	n/a	max. 100	47	70	54	80	51	n/a	100	max. 50-100	n/a	60	53	n/a	47	n/a	Max. 50-100	100	n/a	n/a	n/a	n/a	78	78	n/a	n/a	max. 100-200	max. 50-100	48-84	n/a	n/a	100	45-90	66	n/a	n/a	n/a	61	68	70	n/a	n/a
Material prices
Price cathode active material	$/kg	14	10	16.8	12	Lithium: 0-25	n/a	3.75	10	9.4	10	50	21	10.9	n/a	55	21	16.7	20	12.4	n/a	n/a	n/a	33	35	Lithium: 0-25	26.17	26	33	21.1	n/a	n/a	31	30	27	30.2	30.4	31	33	41.9	22.5	20	n/a	n/a	26	19.9	20.6	n/a	n/a
Price anode active material	$/kg	18.5	n/a	13.9	19	n/a	19	n/a	15	13	10	19	19	13	n/a	19	18.5	13.9	19	13	n/a	n/a	n/a	18.5	19	n/a	n/a	19	n/a	13	n/a	n/a	19	20	18.5	15.8	13.9	19	19	19.8	13	15	n/a	n/a	n/a	13	13	9.8	22.4
							from Sakti et al. (a)																										from Sakti et al. (a)
Specific energy
Specific capacity cathode active material	mAh/g	100	100	120	130	n/a	100	100	100	130	148	130	140	140	120	150	150	160	160	170	150	150-170	165	200	190	n/a	180	200	n/a	200-205	200-205	200	130-180	150	155	160	150	150	170	150	170	155	155	155	175	175	180	n/a	n/a
Forecast
Currency		USD	USD	EUR	USD	USD	USD	USD	USD	USD	USD	USD	USD	USD	USD	USD	USD	EUR	USD	USD	USD	USD	USD	USD	USD	USD	USD	USD	EUR	USD	USD	USD	USD	USD	USD	EUR	EUR	USD	USD	USD	USD	USD	USD	USD	USD	USD	USD	USD	USD
Forecast level		Cell	Pack	Material	Cell	Cell	Pack	Cell	Pack	Material	Cell	Cell	Cell	Material	Pack	Cell	Cell	Material	Cell	Material	Pack	Cell	Pack	Cell	Cell	Cell	Cell	Stack	Pack	Material	Cell	Pack	Pack	Pack	Cell	Cell	Material	Pack	Cell	Pack	Material	Cell	Cell	Cell	Pack	Material	Material	Pack	Pack
Forecast item		Cost	Cost	Cost	Cost	Cost	Cost	Cost	Cost	Cost	Cost	Cost	Cost	Cost	Price	Cost	Cost	Cost	Cost	Cost	Price	Cost	Price	Cost	Cost	Cost	Cost	Cost	Price	Cost	Cost	Price	Cost	Cost	Cost	Cost	Cost	Cost	Cost	Cost	Cost	Cost	Price	Price	Cost	Cost	Cost	Cost	Cost
Upper bound	per kWh	375				200	587	439			180						402					145		319		226	276		180	74	101		451	267	306	189		370		502.8			100	220	188
Lower bound	per kWh	262	226	103.2	213	162	512	163	259	76	105	295	193	65	123	273	284	110	277	85	107	97	107	243	220	180	186	74	155	70	75	158	310	162	233	156	111.18	200	224	370.3	88	186	85	190	161	82	81	432	293
Source		Figure 3	Table 6	Figure 5	Cost model	Figure 2, high-energy	Figure 4	Figure 8	Figure 1c	Cost model	Figure 4	Cost model	Cost model	Cost model	Figure 6	Cost model	Figure 3	Figure 5	Cost model	Cost model	Figure 6	Figure 7	Figure 6	Figure 3	Cost model	Figure 2, high-energy	Figure 8	Figure 7	Figure 8	Cost model	Figure 7	Figure 6	Figure 4 (Verweis einbauen auf Datentabelle)	Figure 4	Figure 3	Figure 5.4	Figure 5	Figure 12 (BEV)	Cost model	Figure 1	Cost model	Figure 2, 4C "automotive"	Figure 10, high-energy, large-format, 10-100 GWh	Figure 10, high-energy, large-format, 10-100 GWh	Table 6, article text p. 515	Cost model	Cost model	Figure 6, calculated	Figure 8, calculated
Drivers of uncertainty		Electrode thickness				Lithium price, material cost	Variance of experts A, F, G (2018)	Material prices, process parameters, cell format			Material prices						Electrode thickness					Specific capacity, process parameters		Electrode thickness		Lithium price, material cost	Material prices, process parameters, cell format		Plant location, process, energy density	Cobalt content	Cobalt content, process parameters		Variance of experts C, D, E, H (2018)	Share of useable energy	Electrode thickness	Electrode thickness, process parameters		Electrode thickness, process parameters, material prices		Electrode thickness, process improvements			Production volume	Production volume	Production volume
Converted currency
Upper bound		375				200	587	439			180						402					145		319		226	276		201.496	74	101		451	267	306	209.716		370		502.8			100	220	188
Lower bound		262	226	114.512	213	162	512	163	259	76	105	295	193	65	123	273	284	122.057	277	85	107	97	107	243	220	180	186	74	173.511	70	75	158	310	162	233	173.099	123.366	200	224	370.3	88	186	85	190	161	82	81	432	293
Converted forecast level
Upper bound		490.837				261.78	587	574.607			235.602						526.178					189.79		417.539		295.811	361.256		201.496	129.316	132.199		451	267	400.523	274.498		370		502.8			130.89	287.958	188
Lower bound		342.932	226	200.111	278.796	212.042	512	213.351	259	132.811	137.434	386.125	252.618	113.588	123	357.33	371.728	213.296	362.565	148.539	107	126.963	107	318.063	287.958	235.602	243.455	150.188	173.511	122.326	98.1675	158	310	162	304.974	226.569	215.584	200	293.194	370.3	153.781	243.455	111.257	248.691	161	143.296	141.549	432	293
[truncated: 27 more columns]

## Sheet: Fig. 8 SSB
Technology-specific forecast values (SSB)
	Unit
Publication		Schnell et al. (a)	Schnell et al. (a)	Schnell et al. (b)	Schnell et al. (a)	Schnell et al. (b)	Schmuch et al.	Schnell et al. (b)
Year published		2019	2019	2020	2019	2020	2018	2020
Technology
Cathode active material		LNMO	NMC811	NMC811	HE-NMC	NMC811	HE-NMC	NMC811
Separator		LLZ (oxide)	LLZ (oxide)	LLZ (oxide)	LLZ (oxide)	LPS (sulfide)	LPS (sulfide)	LPS (sulfide)
Anode active material		Li	Li	Li	Li	C	Li	Li
Design
Cathode thickness	microns	70-150	70-150	100	70-150	100	65	100
Anode thickness	microns	20-43	31-66	41	42-89	133	20-200	41
Anode material excess	%	10	10	50	10	n/a	20-300	50
Separator thickness	microns	10	10	20	10	20	<=20	20
Material prices
Price cathode active material	$/kg	21	24	24	20	24	20	24
Price separator	$/kg	20-100	50	10-100	20-100	50	50	10-100
Price anode active material	$/kg	250 (foil)	250 (foil)	130 (ingot)	250 (foil)	19	100-1000 (foil)	130 (ingot)
Specific energy
Specific energy (cell)	Wh/kg			314		231		383
Specific energy (galvanic cell)	Wh/kg	314	363	464.851	472	271	430-610	567
based on cathode thickness	microns	70	70	100	70	100	50-150	100
Source		Table 3	Table 3	Figure 5c, estimation of galvanic-cell level specific energy based on ratio of sulfidic cell	Table 3	Figure 2a, specific energy on galvanic cell level derived from mentioned cell-level specific energy, cell-level energy content, cell weight and deduction of housing weight	Figure 6	Figure 2a, specific energy on galvanic cell level derived from mentioned cell-level specific energy, cell-level energy content, cell weight and deduction of housing weight
Plant capacity	GWh	>10	>10	6	>10	6	n/a	6
Forecast
Forecast item		Cost	Cost	Cost	Cost	Cost	Cost	Cost
Forecast level		Cell	Cell	Cell	Cell	Cell	Stack	Cell
Upper bound	$/kWh	415	297.3	267	280		127	132
Lower bound	$/kWh	175	188.2	123	120	158.8	59	86
Source		Figure 4c	Table 3	Figure 6	Figure 4c	Figure 2b	Figure 7	Figure 6
Drivers of uncertainty		Electrode thickness, electrolyte price	Electrode thickness	Electrolyte price	Electrode thickness, electrolyte price		Excess lithium, Lithium foil price	Electrolyte price
Converted forecast level
Upper bound	$/kWh	543.193	389.136	349.476	366.492		257.754	172.775
Lower bound	$/kWh	229.058	246.335	160.995	157.068	207.853	119.744	112.565

## Sheet: Fig. 8 LSB
Technology-specific forecast values (LSB)
	Unit
Publication		Hagen et al.	Eroglu et al.	Berg et al.
Year published		2015	2015	2015
Technology
Cathode active material		Li2S	Li2S	Li2S
Anode active material		Li	Li	Li
Cathode thickness		20-150	35-150	100
Sulfur loading	mg/cm2	1,0-6,0	2,62-12,25	8.5
			Converted based on statement 8 mAh/cm2 equals 7 mg/cm2
Material prices
Price cathode active material	$/kg	n/a	0.22	0.05
Price anode active material	$/kg	100	100	100
Specific energy
Specific energy (cell)	Wh/kg	100-350	150-600	577
Source		Figure 8d	Figure 2, mean excess Li, mean electrolyte volume in cathode	Calculation model
Forecast
Forecast item		Cost	Price	Cost
Forecast level		Material	Pack	Cell
Upper bound	$/kWh	250	270
Lower bound	$/kWh	70	80	153.7
Source		Figure 8	Figure 7a	Calculation model
Drivers of uncertainty		Sulfur loading, electrolyte/sulfur ratio, sulfur utilization	Sulfur loading, excess Li, electrolyte volume fraction, sulfur to carbon ratio, material cost
Converted forecast level
Upper bound	$/kWh	436.878	270
Lower bound	$/kWh	122.326	80	201.178

## Sheet: Fig. 8 LAB
Technology-specific forecast values (LAB)
	Unit
Publication		Gallagher et al.	Berg et al.
Year published	-	2014	2015
Technology
Cathode active material	-	Li2O2	Li2O2
Anode active material	-	Li	Li
Cathode thickness	microns	max. 200	100
Material prices
Price cathode active material	$/kg	0	0
Price anode active material	$/kg	100	100
Specific energy
Specific energy (cell)	Wh/kg	800	894
Source	-	Figure S6	Calculation model
Forecast
Forecast item		Price	Cost
Forecast level		Pack	Cell
Upper bound	$/kWh	200
Lower bound	$/kWh	70	105.1
Source		Figure 4	Calculation model
Drivers of uncertainty		Share of useable energy
Converted forecast level
Upper bound	$/kWh	200
Lower bound	$/kWh	70	137.565

## Sheet: Fig. 9
Model fit (rational)
		General model fit		f(x)=(p1)/(x+q1)
Coefficients (with 95% confidence bounds)
	p1	3043	(2840, 3246)
	q1	-2007	(-2007, -2007)
Goodness of fit
	SSE	1.068e+06
	R-square	0.804
	Adjusted R-square	0.8032
	RMSE	67.42
	x	2010	2015	2020	2025	2030	2035	2040	2045	2050
	f(x)	1014.33	380.375	234.077	169.056	132.304	108.679	92.2121	80.0789	70.7674

## Sheet: Forecast_Data
Detailed time-based forecasted values (original forecast level, original currency)
					Forecasted value
Publication	Year published	Technology	Scenario		2010	2011	2012	2013	2014	2015	2016	2017	2018	2019	2020	2021	2022	2023	2024	2025	2026	2027	2028	2029	2030	2031	2032	2033	2034	2035	2036	2037	2038	2039	2040	2041	2042	2043	2044	2045	2046	2047	2048	2049	2050	Source
Baker et al.	2010	LIB	No funding for LIB												300																															Figure 3, incl. Funding order p. 1143
Baker et al.	2010	LIB	30 million USD R&D funding per year for LIB												263																															Figure 3, incl. Funding order p. 1143
Baker et al.	2010	LIB	70 million USD R&D funding per year for LIB												232																															Figure 3, incl. Funding order p. 1143
Thiel et al.	2010	LIB	BEV medium sales scenario		600										257.833										199.542																					Extracted from Table 2, Battery cost divided by battery size 24 kWh
Thiel et al.	2010	LIB	BEV high sales scenario		600										257.833										188.167																					Extracted from Table 2, Battery cost divided by battery size 24 kWh
Gerssen-Gondelach and Faaij	2012	LIB	Progress ratio 91%, 2010: 1200 USD/kWh		1200		990			759	718	687	656	636	615																															2010-2020: Measured from Figure 3
Gerssen-Gondelach and Faaij	2012	LIB	Progress ratio 83%, 2010: 1200 USD/kWh		1200		800			482	435	390	364	333	313																															2010-2020: Measured from Figure 3
Gerssen-Gondelach and Faaij	2012	LIB	Progress ratio 91%, 2010: 800 USD/kWh		800		657			512	482	462	441	425	410																															2010-2020: Measured from Figure 3
Gerssen-Gondelach and Faaij	2012	LIB	Progress ratio 83%, 2010: 800 USD/kWh		800		538			323	292	262	246	226	210																															2010-2020: Measured from Figure 3
Gerssen-Gondelach and Faaij	2012	LSB	Upper boundary																	500																										Table 9
Gerssen-Gondelach and Faaij	2012	LSB	Lower boundary																	250																										Table 9
Gerssen-Gondelach and Faaij	2012	LAB	Upper boundary																						700																					Table 9
Gerssen-Gondelach and Faaij	2012	LAB	Lower boundary																						300																					Table 9
Weiss et al.	2012	LIB	Lower boundary		500										200										100																					Extracted from article text, p. 384
Weiss et al.	2012	LIB	Upper boundary		1200										440										100																					Extracted from article text, p. 384
Mayer et al.	2012	LIB	High-energy battery, medium learning, 3-year patent growth rate		871										326																															Extracted from article text p. 14471
Mayer et al.	2012	LIB	High-energy battery, medium learning, 6-year patent growth rate		871										390																															Extracted from article text p. 14472
Mayer et al.	2012	LIB	High-energy battery, slow learning, 3-year patent growth rate		871										345																															Extracted from article text p. 14473
Mayer et al.	2012	LIB	High-energy battery, slow learning, 6-year patent growth rate		871										408																															Extracted from article text p. 14474
Mayer et al.	2012	LIB	High-energy battery, fast learning, 3-year patent growth rate		871										309																															Extracted from article text p. 14475
Mayer et al.	2012	LIB	High-energy battery, fast learning, 6-year patent growth rate		871										373																															Extracted from article text p. 14476
Catenacci et al.	2013	LIB	Current R&D Funding, LIB, BEV, Expert 1				500																		750																					2012: Extracted from article text, p. 6, 2030: Measured from Figure 6
Catenacci et al.	2013	LIB	Current R&D Funding, LIB, BEV, Expert 2				500																		630																					2012: Extracted from article text, p. 6, 2030: Measured from Figure 6
Catenacci et al.	2013	LIB	Current R&D Funding, LIB, BEV, Expert 3				500																		600																					2012: Extracted from article text, p. 6, 2030: Measured from Figure 6
Catenacci et al.	2013	LIB	Current R&D Funding, LIB, BEV, Expert 4				500																		560																					2012: Extracted from article text, p. 6, 2030: Measured from Figure 6
Catenacci et al.	2013	LIB	Current R&D Funding, LIB, BEV, Expert 5				500																		280																					2012: Extracted from article text, p. 6, 2030: Measured from Figure 6
Catenacci et al.	2013	LIB	Current R&D Funding, LIB, BEV, Expert 6				500																		200																					2012: Extracted from article text, p. 6, 2030: Measured from Figure 6
Catenacci et al.	2013	LIB	Current R&D Funding, LIB, BEV, Expert 7				500																		215																					2012: Extracted from article text, p. 6, 2030: Measured from Figure 6
Catenacci et al.	2013	LIB	R&D Funding +50%, LIB BEV, Expert 1				500																		500																					2012: Extracted from article text, p. 6, 2030: Measured from Figure 6
Catenacci et al.	2013	LIB	R&D Funding +50%, LIB BEV, Expert 2				500																		510																					2012: Extracted from article text, p. 6, 2030: Measured from Figure 6
Catenacci et al.	2013	LIB	R&D Funding +50%, LIB BEV, Expert 3				500																		540																					2012: Extracted from article text, p. 6, 2030: Measured from Figure 6
Catenacci et al.	2013	LIB	R&D Funding +50%, LIB BEV, Expert 4				500																		520																					2012: Extracted from article text, p. 6, 2030: Measured from Figure 6
Catenacci et al.	2013	LIB	R&D Funding +50%, LIB BEV, Expert 5				500																		280																					2012: Extracted from article text, p. 6, 2030: Measured from Figure 6
Catenacci et al.	2013	LIB	R&D Funding +50%, LIB BEV, Expert 6				500																		200																					2012: Extracted from article text, p. 6, 2030: Measured from Figure 6
Catenacci et al.	2013	LIB	R&D Funding +50%, LIB BEV, Expert 7				500																		215																					2012: Extracted from article text, p. 6, 2030: Measured from Figure 6
Catenacci et al.	2013	LIB	R&D Funding +100%, LIB BEV, Expert 1				500																		300																					2012: Extracted from article text, p. 6, 2030: Measured from Figure 6
Catenacci et al.	2013	LIB	R&D Funding +100%, LIB BEV, Expert 2				500																		430																					2012: Extracted from article text, p. 6, 2030: Measured from Figure 6
Catenacci et al.	2013	LIB	R&D Funding +100%, LIB BEV, Expert 3				500																		530																					2012: Extracted from article text, p. 6, 2030: Measured from Figure 6
Catenacci et al.	2013	LIB	R&D Funding +100%, LIB BEV, Expert 4				500																		480																					2012: Extracted from article text, p. 6, 2030: Measured from Figure 6
Catenacci et al.	2013	LIB	R&D Funding +100%, LIB BEV, Expert 5				500																		280																					2012: Extracted from article text, p. 6, 2030: Measured from Figure 6
Catenacci et al.	2013	LIB	R&D Funding +100%, LIB BEV, Expert 6				500																																							2012: Extracted from article text, p. 6, 2030: Measured from Figure 6
Catenacci et al.	2013	LIB	R&D Funding +100%, LIB BEV, Expert 7				500																		215																					2012: Extracted from article text, p. 6, 2030: Measured from Figure 6
Nykvist and Nilsson	2015	LIB	EV						410				230																																	2014: Extracted from article text p. 329; 2018: Extracted from article text p. 330
Cole et al.	2016	LIB	Mid Cost Projection								395	367	340	311	281	271	255	248	233	221	218	214	209	206	200	198	196	194	192	190	189	188	187	186	185	183	182	180	179	178	176	175	173	171	170	Measured from Figure 1
Cole et al.	2016	LIB	High Cost Projection								418	413	406	400	395	384	372	361	350	338	328	318	312	298	290	288	285	282	280	278	277	276	276	276	275	273	271	268	266	264	261	260	258	256	255	Measured from Figure 1
Cole et al.	2016	LIB	Low Cost Projection								380	336	294	249	209	188	169	154	135	119	109	101	96	85	78	76	75	74	73	72	72	71	70	69	68	68	68	67	66	66	66	65	64	64	64	Measured from Figure 1
Schmidt et al.	2017	LIB	LIB, EV, central experience rate									312	294	275	256	238	220	204	188	173	160	148	136	126	117	109.547	102.597	96.5403	91.2929	86.763	82.8566	79.483	76.5589	74.0113	72	69.806	68.0531	66.4839	65.0697	63.7873	62.6174	61.5445	60.5557	59.6401	59	Supplementary materials, worksheet Figure 3
Schmidt et al.	2017	LIB	LIB, EV, low experience rate									316.9	303.671	289.775	275.558	261.327	247.33	233.757	220.742	208.38	196.733	185.844	175.742	166.447	157.969	150.308	143.45	137.365	132.003	127.302	123.192	119.597	116.446	113.672	111.217	109.031	107.074	105.309	103.708	102.248	100.908	99.6734	98.5297	97.4661	96.473	Supplementary materials, worksheet Figure 3
Schmidt et al.	2017	LIB	LIB, EV, high experience rate									307.37	284.572	261.474	238.751	216.933	196.39	177.345	159.903	144.086	129.861	117.162	105.906	95.9992	87.3447	79.8399	73.3783	67.8489	63.1381	59.1335	55.7279	52.8236	50.3348	48.1886	46.3243	44.6924	43.2526	41.9728	40.8268	39.7937	38.8565	38.0014	37.2171	36.4942	35.8249	Supplementary materials, worksheet Figure 3
Kittner et al.	2017	LIB	EV/ES battery pack									178.41	157.5	139.8	124.24																															Extracted from Table 1
Berckmans et al.	2017	LIB	Battery I							466					193					115					76																					Figure 11
Berckmans et al.	2017	LIB	Battery II							317					131					78					50																					Figure 12
Sakti et al. (based on PBCM)	2017	LIB	Expert A, Design 2 (BEV)					397					512																																	Measured from Figure 4
Sakti et al. (based on PBCM)	2017	LIB	Expert F&G, Design 2 (BEV)					680					587																																	Measured from Figure 4
Sakti et al. (based on PBCM)	2017	LIB	Expert C, Design 2 (BEV)					480					451																																	Measured from Figure 4
Sakti et al. (based on PBCM)	2017	LIB	Expert D&E, Design 2 (BEV)					445					370																																	Measured from Figure 4
Sakti et al. (based on PBCM)	2017	LIB	Expert B, Design 2 (BEV)					only cell					only cell																																	Measured from Figure 4
Sakti et al. (based on PBCM)	2017	LIB	Expert H, Design 2 (BEV)					480					310																																	Measured from Figure 4
Sakti et al. (based on PBCM)	2017	LIB	Expert J, Design 2 (BEV)					412					255																																	Measured from Figure 4
Sakti et al. (based on PBCM)	2017	LIB	Expert I, Design 2 (BEV)					387					363																																	Measured from Figure 4
Sakti et al. (based on PBCM)	2017	LIB	Expert L, Design 2 (BEV)					1034					766																																	Measured from Figure 4
Sakti et al. (based on PBCM)	2017	LIB	Expert K, Design 2 (BEV)					n.a.					n.a.																																	Measured from Figure 4
Sakti et al. (based on pack estimates)	2017	LIB	Expert A, Design 2 (BEV)					1090					744																																	Measured from Figure 4
Sakti et al. (based on pack estimates)	2017	LIB	Expert F&G, Design 2 (BEV)					595		362			548																																	Measured from Figure 4
Sakti et al. (based on pack estimates)	2017	LIB	Expert C, Design 2 (BEV)					540		1265			415																																	Measured from Figure 4
Sakti et al. (based on pack estimates)	2017	LIB	Expert D&E, Design 2 (BEV)					506					410																																	Measured from Figure 4
Sakti et al. (based on pack estimates)	2017	LIB	Expert B, Design 2 (BEV)					no pack					no pack																																	Measured from Figure 4
Sakti et al. (based on pack estimates)	2017	LIB	Expert H, Design 2 (BEV)					628					320																																	Measured from Figure 4
Sakti et al. (based on pack estimates)	2017	LIB	Expert J, Design 2 (BEV)					745					393																																	Measured from Figure 4
Sakti et al. (based on pack estimates)	2017	LIB	Expert I, Design 2 (BEV)					446					345																																	Measured from Figure 4
Sakti et al. (based on pack estimates)	2017	LIB	Expert L, Design 2 (BEV)					1190					370																																	Measured from Figure 4
Sakti et al. (based on pack estimates)	2017	LIB	Expert K, Design 2 (BEV)					n.a.					n.a.																																	Measured from Figure 4
Sakti et al. (based on component estimates)	2017	LIB	Expert A, Design 2 (BEV)					only cell					only cell																																	Measured from Figure 4
Sakti et al. (based on component estimates)	2017	LIB	Expert F&G, Design 2 (BEV)					595					548																																	Measured from Figure 4
Sakti et al. (based on component estimates)	2017	LIB	Expert C, Design 2 (BEV)					393					330																																	Measured from Figure 4
Sakti et al. (based on component estimates)	2017	LIB	Expert D&E, Design 2 (BEV)					460					365																																	Measured from Figure 4
Sakti et al. (based on component estimates)	2017	LIB	Expert B, Design 2 (BEV)					only cell					only cell																																	Measured from Figure 4
Sakti et al. (based on component estimates)	2017	LIB	Expert H, Design 2 (BEV)					432					273																																	Measured from Figure 4
Sakti et al. (based on component estimates)	2017	LIB	Expert J, Design 2 (BEV)					410					273																																	Measured from Figure 4
Sakti et al. (based on component estimates)	2017	LIB	Expert I, Design 2 (BEV)					362					307																																	Measured from Figure 4
Sakti et al. (based on component estimates)	2017	LIB	Expert L, Design 2 (BEV)					1265					664																																	Measured from Figure 4
Sakti et al. (based on component estimates)	2017	LIB	Expert K, Design 2 (BEV)					n.a.					n.a.																																	Measured from Figure 4
Few et al.	2018	LIB	Lower boundary												175										120																					Extracted from article text, p. 582
Few et al.	2018	LIB	Upper boundary												350										250																					Extracted from article text, p. 582
Few et al.	2018	LIB	Expert A, Tech only, 1xR&D, 10th percentile												300										160																					Supplementary materials, worksheet Costs
Few et al.	2018	LIB	Expert A, Tech only, 1xR&D, 50th percentile												325										220																					Supplementary materials, worksheet Costs
Few et al.	2018	LIB	Expert A, Tech only, 1xR&D, 90th percentile												350										250																					Supplementary materials, worksheet Costs
Few et al.	2018	LIB	Expert A, Tech only, 2xR&D, 10th percentile												280										150																					Supplementary materials, worksheet Costs
Few et al.	2018	LIB	Expert A, Tech only, 2xR&D, 50th percentile												300										190																					Supplementary materials, worksheet Costs
Few et al.	2018	LIB	Expert A, Tech only, 2xR&D, 90th percentile												350										230																					Supplementary materials, worksheet Costs
Few et al.	2018	LIB	Expert A, Tech only, 10xR&D, 10th percentile												270										100																					Supplementary materials, worksheet Costs
Few et al.	2018	LIB	Expert A, Tech only, 10xR&D, 50th percentile												290										185																					Supplementary materials, worksheet Costs
Few et al.	2018	LIB	Expert A, Tech only, 10xR&D, 90th percentile												350										230																					Supplementary materials, worksheet Costs
Few et al.	2018	LIB	Expert A, All factors, 1xR&D, 10th percentile												250										150																					Supplementary materials, worksheet Costs
Few et al.	2018	LIB	Expert A, All factors, 1xR&D, 50th percentile												270										180																					Supplementary materials, worksheet Costs
Few et al.	2018	LIB	Expert A, All factors, 1xR&D, 90th percentile												350										220																					Supplementary materials, worksheet Costs
Few et al.	2018	LIB	Expert A, All factors, 2xR&D, 10th percentile												250										140																					Supplementary materials, worksheet Costs
Few et al.	2018	LIB	Expert A, All factors, 2xR&D, 50th percentile												270										180																					Supplementary materials, worksheet Costs
Few et al.	2018	LIB	Expert A, All factors, 2xR&D, 90th percentile												350										220																					Supplementary materials, worksheet Costs
Few et al.	2018	LIB	Expert A, All factors, 10xR&D, 10th percentile												250										110																					Supplementary materials, worksheet Costs
Few et al.	2018	LIB	Expert A, All factors, 10xR&D, 50th percentile												270										175																					Supplementary materials, worksheet Costs
Few et al.	2018	LIB	Expert A, All factors, 10xR&D, 90th percentile												325										200																					Supplementary materials, worksheet Costs
Few et al.	2018	LIB	Expert B, Tech only, 1xR&D, 10th percentile												250										200																					Supplementary materials, worksheet Costs
Few et al.	2018	LIB	Expert B, Tech only, 1xR&D, 50th percentile												300										255																					Supplementary materials, worksheet Costs
Few et al.	2018	LIB	Expert B, Tech only, 1xR&D, 90th percentile												500										300																					Supplementary materials, worksheet Costs
Few et al.	2018	LIB	Expert B, Tech only, 2xR&D, 10th percentile												230										150																					Supplementary materials, worksheet Costs
Few et al.	2018	LIB	Expert B, Tech only, 2xR&D, 50th percentile												290										245																					Supplementary materials, worksheet Costs
Few et al.	2018	LIB	Expert B, Tech only, 2xR&D, 90th percentile												500										280																					Supplementary materials, worksheet Costs
Few et al.	2018	LIB	Expert B, Tech only, 10xR&D, 10th percentile												230										120																					Supplementary materials, worksheet Costs
Few et al.	2018	LIB	Expert B, Tech only, 10xR&D, 50th percentile												280										200																					Supplementary materials, worksheet Costs
Few et al.	2018	LIB	Expert B, Tech only, 10xR&D, 90th percentile												500										280																					Supplementary materials, worksheet Costs
Few et al.	2018	LIB	Expert B, All factors, 1xR&D, 10th percentile												200										120																					Supplementary materials, worksheet Costs
Few et al.	2018	LIB	Expert B, All factors, 1xR&D, 50th percentile												240										180																					Supplementary materials, worksheet Costs
Few et al.	2018	LIB	Expert B, All factors, 1xR&D, 90th percentile												450										300																					Supplementary materials, worksheet Costs
Few et al.	2018	LIB	Expert B, All factors, 2xR&D, 10th percentile												180										80																					Supplementary materials, worksheet Costs
Few et al.	2018	LIB	Expert B, All factors, 2xR&D, 50th percentile												230										150																					Supplementary materials, worksheet Costs
Few et al.	2018	LIB	Expert B, All factors, 2xR&D, 90th percentile												450										250																					Supplementary materials, worksheet Costs
Few et al.	2018	LIB	Expert B, All factors, 10xR&D, 10th percentile												180										50																					Supplementary materials, worksheet Costs
Few et al.	2018	LIB	Expert B, All factors, 10xR&D, 50th percentile												210										150																					Supplementary materials, worksheet Costs
Few et al.	2018	LIB	Expert B, All factors, 10xR&D, 90th percentile												450										250																					Supplementary materials, worksheet Costs
Few et al.	2018	LIB	Expert C, Tech only, 1xR&D, 10th percentile												250										150																					Supplementary materials, worksheet Costs
Few et al.	2018	LIB	Expert C, Tech only, 1xR&D, 50th percentile												300										200																					Supplementary materials, worksheet Costs
Few et al.	2018	LIB	Expert C, Tech only, 1xR&D, 90th percentile												350										300																					Supplementary materials, worksheet Costs
Few et al.	2018	LIB	Expert C, Tech only, 2xR&D, 10th percentile												250										135																					Supplementary materials, worksheet Costs
Few et al.	2018	LIB	Expert C, Tech only, 2xR&D, 50th percentile												300										195																					Supplementary materials, worksheet Costs
Few et al.	2018	LIB	Expert C, Tech only, 2xR&D, 90th percentile												350										300																					Supplementary materials, worksheet Costs
Few et al.	2018	LIB	Expert C, Tech only, 10xR&D, 10th percentile												200										120																					Supplementary materials, worksheet Costs
Few et al.	2018	LIB	Expert C, Tech only, 10xR&D, 50th percentile												250										185																					Supplementary materials, worksheet Costs
Few et al.	2018	LIB	Expert C, Tech only, 10xR&D, 90th percentile												300										300																					Supplementary materials, worksheet Costs
Few et al.	2018	LIB	Expert C, All factors, 1xR&D, 10th percentile												200										100																					Supplementary materials, worksheet Costs
Few et al.	2018	LIB	Expert C, All factors, 1xR&D, 50th percentile												240										200																					Supplementary materials, worksheet Costs
Few et al.	2018	LIB	Expert C, All factors, 1xR&D, 90th percentile												300										300																					Supplementary materials, worksheet Costs
Few et al.	2018	LIB	Expert C, All factors, 2xR&D, 10th percentile												200										75																					Supplementary materials, worksheet Costs
Few et al.	2018	LIB	Expert C, All factors, 2xR&D, 50th percentile												240										150																					Supplementary materials, worksheet Costs
Few et al.	2018	LIB	Expert C, All factors, 2xR&D, 90th percentile												300										300																					Supplementary materials, worksheet Costs
Few et al.	2018	LIB	Expert C, All factors, 10xR&D, 10th percentile												160										50																					Supplementary materials, worksheet Costs
Few et al.	2018	LIB	Expert C, All factors, 10xR&D, 50th percentile												215										100																					Supplementary materials, worksheet Costs
Few et al.	2018	LIB	Expert C, All factors, 10xR&D, 90th percentile												300										300																					Supplementary materials, worksheet Costs
Few et al.	2018	LIB	Expert D, Tech only, 1xR&D, 10th percentile												250										230																					Supplementary materials, worksheet Costs
Few et al.	2018	LIB	Expert D, Tech only, 1xR&D, 50th percentile												300										260																					Supplementary materials, worksheet Costs
Few et al.	2018	LIB	Expert D, Tech only, 1xR&D, 90th percentile												400										300																					Supplementary materials, worksheet Costs
Few et al.	2018	LIB	Expert D, Tech only, 2xR&D, 10th percentile												240										210																					Supplementary materials, worksheet Costs
Few et al.	2018	LIB	Expert D, Tech only, 2xR&D, 50th percentile												280										250																					Supplementary materials, worksheet Costs
Few et al.	2018	LIB	Expert D, Tech only, 2xR&D, 90th percentile												400										300																					Supplementary materials, worksheet Costs
Few et al.	2018	LIB	Expert D, Tech only, 10xR&D, 10th percentile												220										150																					Supplementary materials, worksheet Costs
Few et al.	2018	LIB	Expert D, Tech only, 10xR&D, 50th percentile												250										200																					Supplementary materials, worksheet Costs
Few et al.	2018	LIB	Expert D, Tech only, 10xR&D, 90th percentile												300										250																					Supplementary materials, worksheet Costs
Few et al.	2018	LIB	Expert D, All factors, 1xR&D, 10th percentile												230										220																					Supplementary materials, worksheet Costs
Few et al.	2018	LIB	Expert D, All factors, 1xR&D, 50th percentile												280										250																					Supplementary materials, worksheet Costs
Few et al.	2018	LIB	Expert D, All factors, 1xR&D, 90th percentile												350										300																					Supplementary materials, worksheet Costs
Few et al.	2018	LIB	Expert D, All factors, 2xR&D, 10th percentile												200										200																					Supplementary materials, worksheet Costs
Few et al.	2018	LIB	Expert D, All factors, 2xR&D, 50th percentile												250										240																					Supplementary materials, worksheet Costs
Few et al.	2018	LIB	Expert D, All factors, 2xR&D, 90th percentile												300										280																					Supplementary materials, worksheet Costs
Few et al.	2018	LIB	Expert D, All factors, 10xR&D, 10th percentile												190										140																					Supplementary materials, worksheet Costs
Few et al.	2018	LIB	Expert D, All factors, 10xR&D, 50th percentile												230										180																					Supplementary materials, worksheet Costs
Few et al.	2018	LIB	Expert D, All factors, 10xR&D, 90th percentile												280										250																					Supplementary materials, worksheet Costs
Few et al.	2018	LIB	Expert E, Tech only, 1xR&D, 10th percentile												200										160																					Supplementary materials, worksheet Costs
Few et al.	2018	LIB	Expert E, Tech only, 1xR&D, 50th percentile												260										210																					Supplementary materials, worksheet Costs
Few et al.	2018	LIB	Expert E, Tech only, 1xR&D, 90th percentile												500										250																					Supplementary materials, worksheet Costs
Few et al.	2018	LIB	Expert E, Tech only, 2xR&D, 10th percentile												150										140																					Supplementary materials, worksheet Costs
Few et al.	2018	LIB	Expert E, Tech only, 2xR&D, 50th percentile												220										170																					Supplementary materials, worksheet Costs
Few et al.	2018	LIB	Expert E, Tech only, 2xR&D, 90th percentile												350										200																					Supplementary materials, worksheet Costs
Few et al.	2018	LIB	Expert E, Tech only, 10xR&D, 10th percentile												130										100																					Supplementary materials, worksheet Costs
Few et al.	2018	LIB	Expert E, Tech only, 10xR&D, 50th percentile												180										140																					Supplementary materials, worksheet Costs
Few et al.	2018	LIB	Expert E, Tech only, 10xR&D, 90th percentile												250										180																					Supplementary materials, worksheet Costs
Few et al.	2018	LIB	Expert E, All factors, 1xR&D, 10th percentile																																											Supplementary materials, worksheet Costs
Few et al.	2018	LIB	Expert E, All factors, 1xR&D, 50th percentile																																											Supplementary materials, worksheet Costs
Few et al.	2018	LIB	Expert E, All factors, 1xR&D, 90th percentile																																											Supplementary materials, worksheet Costs
Few et al.	2018	LIB	Expert E, All factors, 2xR&D, 10th percentile																																											Supplementary materials, worksheet Costs
Few et al.	2018	LIB	Expert E, All factors, 2xR&D, 50th percentile																																											Supplementary materials, worksheet Costs
Few et al.	2018	LIB	Expert E, All factors, 2xR&D, 90th percentile																																											Supplementary materials, worksheet Costs
Few et al.	2018	LIB	Expert E, All factors, 10xR&D, 10th percentile																																											Supplementary materials, worksheet Costs
Few et al.	2018	LIB	Expert E, All factors, 10xR&D, 50th percentile																																											Supplementary materials, worksheet Costs
Few et al.	2018	LIB	Expert E, All factors, 10xR&D, 90th percentile																																											Supplementary materials, worksheet Costs
Few et al.	2018	LIB	Expert F, Tech only, 1xR&D, 10th percentile												200										180																					Supplementary materials, worksheet Costs
Few et al.	2018	LIB	Expert F, Tech only, 1xR&D, 50th percentile												220										200																					Supplementary materials, worksheet Costs
Few et al.	2018	LIB	Expert F, Tech only, 1xR&D, 90th percentile												240										220																					Supplementary materials, worksheet Costs
Few et al.	2018	LIB	Expert F, Tech only, 2xR&D, 10th percentile												190										140																					Supplementary materials, worksheet Costs
Few et al.	2018	LIB	Expert F, Tech only, 2xR&D, 50th percentile												210										170																					Supplementary materials, worksheet Costs
Few et al.	2018	LIB	Expert F, Tech only, 2xR&D, 90th percentile												230										200																					Supplementary materials, worksheet Costs
Few et al.	2018	LIB	Expert F, Tech only, 10xR&D, 10th percentile												180										110																					Supplementary materials, worksheet Costs
Few et al.	2018	LIB	Expert F, Tech only, 10xR&D, 50th percentile												200										140																					Supplementary materials, worksheet Costs
Few et al.	2018	LIB	Expert F, Tech only, 10xR&D, 90th percentile												220										170																					Supplementary materials, worksheet Costs
Few et al.	2018	LIB	Expert F, All factors, 1xR&D, 10th percentile												100										50																					Supplementary materials, worksheet Costs
Few et al.	2018	LIB	Expert F, All factors, 1xR&D, 50th percentile												170										120																					Supplementary materials, worksheet Costs
Few et al.	2018	LIB	Expert F, All factors, 1xR&D, 90th percentile												200										160																					Supplementary materials, worksheet Costs
Few et al.	2018	LIB	Expert F, All factors, 2xR&D, 10th percentile												90										50																					Supplementary materials, worksheet Costs
Few et al.	2018	LIB	Expert F, All factors, 2xR&D, 50th percentile												150										110																					Supplementary materials, worksheet Costs
Few et al.	2018	LIB	Expert F, All factors, 2xR&D, 90th percentile												180										140																					Supplementary materials, worksheet Costs
Few et al.	2018	LIB	Expert F, All factors, 10xR&D, 10th percentile												80										50																					Supplementary materials, worksheet Costs
Few et al.	2018	LIB	Expert F, All factors, 10xR&D, 50th percentile												130										100																					Supplementary materials, worksheet Costs
Few et al.	2018	LIB	Expert F, All factors, 10xR&D, 90th percentile												160										120																					Supplementary materials, worksheet Costs
Few et al.	2018	LIB	Expert G, Tech only, 1xR&D, 10th percentile												511										365																					Supplementary materials, worksheet Costs
Few et al.	2018	LIB	Expert G, Tech only, 1xR&D, 50th percentile												613.2										438																					Supplementary materials, worksheet Costs
Few et al.	2018	LIB	Expert G, Tech only, 1xR&D, 90th percentile												657										511																					Supplementary materials, worksheet Costs
Few et al.	2018	LIB	Expert G, Tech only, 2xR&D, 10th percentile												438										306.6																					Supplementary materials, worksheet Costs
Few et al.	2018	LIB	Expert G, Tech only, 2xR&D, 50th percentile												511										379.6																					Supplementary materials, worksheet Costs
Few et al.	2018	LIB	Expert G, Tech only, 2xR&D, 90th percentile												584										452.6																					Supplementary materials, worksheet Costs
Few et al.	2018	LIB	Expert G, Tech only, 10xR&D, 10th percentile												394.2										277.4																					Supplementary materials, worksheet Costs
Few et al.	2018	LIB	Expert G, Tech only, 10xR&D, 50th percentile												467.2										350.4																					Supplementary materials, worksheet Costs
Few et al.	2018	LIB	Expert G, Tech only, 10xR&D, 90th percentile												540.2										423.4																					Supplementary materials, worksheet Costs
Few et al.	2018	LIB	Expert G, All factors, 1xR&D, 10th percentile												511										306.6																					Supplementary materials, worksheet Costs
Few et al.	2018	LIB	Expert G, All factors, 1xR&D, 50th percentile												584										379.6																					Supplementary materials, worksheet Costs
Few et al.	2018	LIB	Expert G, All factors, 1xR&D, 90th percentile												657										452.6																					Supplementary materials, worksheet Costs
Few et al.	2018	LIB	Expert G, All factors, 2xR&D, 10th percentile												335.8										277.4																					Supplementary materials, worksheet Costs
Few et al.	2018	LIB	Expert G, All factors, 2xR&D, 50th percentile												408.8										350.4																					Supplementary materials, worksheet Costs
Few et al.	2018	LIB	Expert G, All factors, 2xR&D, 90th percentile												481.8										423.4																					Supplementary materials, worksheet Costs
Few et al.	2018	LIB	Expert G, All factors, 10xR&D, 10th percentile												335.8										233.6																					Supplementary materials, worksheet Costs
Few et al.	2018	LIB	Expert G, All factors, 10xR&D, 50th percentile												408.8										306.6																					Supplementary materials, worksheet Costs
Few et al.	2018	LIB	Expert G, All factors, 10xR&D, 90th percentile												481.8										350.4																					Supplementary materials, worksheet Costs
Few et al.	2018	LIB	Expert H, Tech only, 1xR&D, 10th percentile												336										195																					Supplementary materials, worksheet Costs
Few et al.	2018	LIB	Expert H, Tech only, 1xR&D, 50th percentile												420										260																					Supplementary materials, worksheet Costs
Few et al.	2018	LIB	Expert H, Tech only, 1xR&D, 90th percentile												504										325																					Supplementary materials, worksheet Costs
Few et al.	2018	LIB	Expert H, Tech only, 2xR&D, 10th percentile												312										182																					Supplementary materials, worksheet Costs
Few et al.	2018	LIB	Expert H, Tech only, 2xR&D, 50th percentile												420										234																					Supplementary materials, worksheet Costs
Few et al.	2018	LIB	Expert H, Tech only, 2xR&D, 90th percentile												504										312																					Supplementary materials, worksheet Costs
Few et al.	2018	LIB	Expert H, Tech only, 10xR&D, 10th percentile												300										169																					Supplementary materials, worksheet Costs
Few et al.	2018	LIB	Expert H, Tech only, 10xR&D, 50th percentile												360										208																					Supplementary materials, worksheet Costs
Few et al.	2018	LIB	Expert H, Tech only, 10xR&D, 90th percentile												480										299																					Supplementary materials, worksheet Costs
Few et al.	2018	LIB	Expert H, All factors, 1xR&D, 10th percentile												280										150																					Supplementary materials, worksheet Costs
Few et al.	2018	LIB	Expert H, All factors, 1xR&D, 50th percentile												350										200																					Supplementary materials, worksheet Costs
Few et al.	2018	LIB	Expert H, All factors, 1xR&D, 90th percentile												420										250																					Supplementary materials, worksheet Costs
Few et al.	2018	LIB	Expert H, All factors, 2xR&D, 10th percentile												260										140																					Supplementary materials, worksheet Costs
Few et al.	2018	LIB	Expert H, All factors, 2xR&D, 50th percentile												350										180																					Supplementary materials, worksheet Costs
Few et al.	2018	LIB	Expert H, All factors, 2xR&D, 90th percentile												420										240																					Supplementary materials, worksheet Costs
Few et al.	2018	LIB	Expert H, All factors, 10xR&D, 10th percentile												250										130																					Supplementary materials, worksheet Costs
Few et al.	2018	LIB	Expert H, All factors, 10xR&D, 50th percentile												300										160																					Supplementary materials, worksheet Costs
Few et al.	2018	LIB	Expert H, All factors, 10xR&D, 90th percentile												400										230																					Supplementary materials, worksheet Costs
Few et al.	2018	LIB	Expert I, Tech only, 1xR&D, 10th percentile												200										100																					Supplementary materials, worksheet Costs
Few et al.	2018	LIB	Expert I, Tech only, 1xR&D, 50th percentile												400										190																					Supplementary materials, worksheet Costs
Few et al.	2018	LIB	Expert I, Tech only, 1xR&D, 90th percentile												600										300																					Supplementary materials, worksheet Costs
Few et al.	2018	LIB	Expert I, Tech only, 2xR&D, 10th percentile												200										40																					Supplementary materials, worksheet Costs
Few et al.	2018	LIB	Expert I, Tech only, 2xR&D, 50th percentile												400										150																					Supplementary materials, worksheet Costs
Few et al.	2018	LIB	Expert I, Tech only, 2xR&D, 90th percentile												600										280																					Supplementary materials, worksheet Costs
Few et al.	2018	LIB	Expert I, Tech only, 10xR&D, 10th percentile												200										25																					Supplementary materials, worksheet Costs
Few et al.	2018	LIB	Expert I, Tech only, 10xR&D, 50th percentile												400										90																					Supplementary materials, worksheet Costs
Few et al.	2018	LIB	Expert I, Tech only, 10xR&D, 90th percentile												600										200																					Supplementary materials, worksheet Costs
Few et al.	2018	LIB	Expert I, All factors, 1xR&D, 10th percentile												150										50																					Supplementary materials, worksheet Costs
Few et al.	2018	LIB	Expert I, All factors, 1xR&D, 50th percentile												350										150																					Supplementary materials, worksheet Costs
Few et al.	2018	LIB	Expert I, All factors, 1xR&D, 90th percentile												550										250																					Supplementary materials, worksheet Costs
Few et al.	2018	LIB	Expert I, All factors, 2xR&D, 10th percentile												150										30																					Supplementary materials, worksheet Costs
Few et al.	2018	LIB	Expert I, All factors, 2xR&D, 50th percentile												350										90																					Supplementary materials, worksheet Costs
Few et al.	2018	LIB	Expert I, All factors, 2xR&D, 90th percentile												550										200																					Supplementary materials, worksheet Costs
Few et al.	2018	LIB	Expert I, All factors, 10xR&D, 10th percentile												140										25																					Supplementary materials, worksheet Costs
Few et al.	2018	LIB	Expert I, All factors, 10xR&D, 50th percentile												340										80																					Supplementary materials, worksheet Costs
Few et al.	2018	LIB	Expert I, All factors, 10xR&D, 90th percentile												540										190																					Supplementary materials, worksheet Costs
Few et al.	2018	LIB	Expert J, Tech only, 1xR&D, 10th percentile												300										220																					Supplementary materials, worksheet Costs
Few et al.	2018	LIB	Expert J, Tech only, 1xR&D, 50th percentile												350										285																					Supplementary materials, worksheet Costs
Few et al.	2018	LIB	Expert J, Tech only, 1xR&D, 90th percentile												400										350																					Supplementary materials, worksheet Costs
Few et al.	2018	LIB	Expert J, Tech only, 2xR&D, 10th percentile												240										210																					Supplementary materials, worksheet Costs
Few et al.	2018	LIB	Expert J, Tech only, 2xR&D, 50th percentile												295										270																					Supplementary materials, worksheet Costs
Few et al.	2018	LIB	Expert J, Tech only, 2xR&D, 90th percentile												350										330																					Supplementary materials, worksheet Costs
Few et al.	2018	LIB	Expert J, Tech only, 10xR&D, 10th percentile												220										190																					Supplementary materials, worksheet Costs
Few et al.	2018	LIB	Expert J, Tech only, 10xR&D, 50th percentile												285										230																					Supplementary materials, worksheet Costs
Few et al.	2018	LIB	Expert J, Tech only, 10xR&D, 90th percentile												350										270																					Supplementary materials, worksheet Costs
Few et al.	2018	LIB	Expert J, All factors, 1xR&D, 10th percentile												280										205																					Supplementary materials, worksheet Costs
Few et al.	2018	LIB	Expert J, All factors, 1xR&D, 50th percentile												315										252.5																					Supplementary materials, worksheet Costs
Few et al.	2018	LIB	Expert J, All factors, 1xR&D, 90th percentile												350										300																					Supplementary materials, worksheet Costs
Few et al.	2018	LIB	Expert J, All factors, 2xR&D, 10th percentile												225										195																					Supplementary materials, worksheet Costs
Few et al.	2018	LIB	Expert J, All factors, 2xR&D, 50th percentile												277.5										247.5																					Supplementary materials, worksheet Costs
Few et al.	2018	LIB	Expert J, All factors, 2xR&D, 90th percentile												330										300																					Supplementary materials, worksheet Costs
Few et al.	2018	LIB	Expert J, All factors, 10xR&D, 10th percentile												215										175																					Supplementary materials, worksheet Costs
Few et al.	2018	LIB	Expert J, All factors, 10xR&D, 50th percentile												257.5										215																					Supplementary materials, worksheet Costs
Few et al.	2018	LIB	Expert J, All factors, 10xR&D, 90th percentile												300										255																					Supplementary materials, worksheet Costs
Few et al.	2018	LIB	Expert K, Tech only, 1xR&D, 10th percentile												100										50																					Supplementary materials, worksheet Costs
Few et al.	2018	LIB	Expert K, Tech only, 1xR&D, 50th percentile												165										100																					Supplementary materials, worksheet Costs
Few et al.	2018	LIB	Expert K, Tech only, 1xR&D, 90th percentile												200										150																					Supplementary materials, worksheet Costs
Few et al.	2018	LIB	Expert K, Tech only, 2xR&D, 10th percentile												100										50																					Supplementary materials, worksheet Costs
Few et al.	2018	LIB	Expert K, Tech only, 2xR&D, 50th percentile												165										85																					Supplementary materials, worksheet Costs
Few et al.	2018	LIB	Expert K, Tech only, 2xR&D, 90th percentile												200										110																					Supplementary materials, worksheet Costs
Few et al.	2018	LIB	Expert K, Tech only, 10xR&D, 10th percentile												80										20																					Supplementary materials, worksheet Costs
Few et al.	2018	LIB	Expert K, Tech only, 10xR&D, 50th percentile												140										55																					Supplementary materials, worksheet Costs
Few et al.	2018	LIB	Expert K, Tech only, 10xR&D, 90th percentile												180										80																					Supplementary materials, worksheet Costs
Few et al.	2018	LIB	Expert K, All factors, 1xR&D, 10th percentile												100										50																					Supplementary materials, worksheet Costs
Few et al.	2018	LIB	Expert K, All factors, 1xR&D, 50th percentile												165										100																					Supplementary materials, worksheet Costs
Few et al.	2018	LIB	Expert K, All factors, 1xR&D, 90th percentile												200										150																					Supplementary materials, worksheet Costs
Few et al.	2018	LIB	Expert K, All factors, 2xR&D, 10th percentile												80										30																					Supplementary materials, worksheet Costs
Few et al.	2018	LIB	Expert K, All factors, 2xR&D, 50th percentile												135										75																					Supplementary materials, worksheet Costs
Few et al.	2018	LIB	Expert K, All factors, 2xR&D, 90th percentile												180										100																					Supplementary materials, worksheet Costs
Few et al.	2018	LIB	Expert K, All factors, 10xR&D, 10th percentile												50										20																					Supplementary materials, worksheet Costs
Few et al.	2018	LIB	Expert K, All factors, 10xR&D, 50th percentile												95										50																					Supplementary materials, worksheet Costs
Few et al.	2018	LIB	Expert K, All factors, 10xR&D, 90th percentile												130										80																					Supplementary materials, worksheet Costs
Edelenbosch et al.	2018	LIB	Endogeneous, reference, total battery cost										13198	12702	12199	11641	11381	11123	10875	10687	10499	10311	10123	9935	9749	9686.2	9623.4	9560.6	9497.8	9435	9371.2	9307.4	9243.6	9179.8	9116	9069.8	9023.6	8977.4	8931.2	8885	8836	8787	8738	8689	8641	Measured from Supplementary Materials, Figure 1
Edelenbosch et al.	2018	LIB	Endogeneous, market leaders, total battery cost										6747	5965	5700	5658	5616	5574	5532	5490	5448	5406	5364	5322	5280	5260	5240	5220	5200	5180	5155	5130	5105	5080	5055	5030	5005	4980	4955	4930	4905	4880	4855	4830	4805	Measured from Supplementary Materials, Figure 1
Edelenbosch et al.	2018	LIB	Endogeneous, optimistic, total battery cost										6747	5965	5440	5107	4993	4855	4785	4668	4543	4443	4348	4236	4192	4162	4124	4057	4043	4008	3971	3898	3860	3806	3786	3748.4	3710.8	3673.2	3635.6	3598	3560.4	3522.8	3485.2	3447.6	3410	Measured from Supplementary Materials, Figure 1
Edelenbosch et al.	2018	LIB	Battery size (kWh)										44.4	44.2	44	43.8	43.6	43.4	43.2	43	42.8	42.6	42.4	42.2	42	41.8	41.6	41.4	41.2	41	40.8	40.6	40.4	40.2	40	39.8	39.6	39.4	39.2	39	38.8	38.6	38.4	38.2	38	Assumption of decreasing battery size from 45 to 38 kWh, see Article Figure 1
Edelenbosch et al.	2018	LIB	Endogeneous, reference, total battery cost										297.252	287.376	277.25	265.776	261.032	256.29	251.736	248.535	245.304	242.042	238.75	235.427	232.119	231.727	231.332	230.932	230.529	230.122	229.686	229.246	228.802	228.353	227.9	227.884	227.869	227.853	227.837	227.821	227.732	227.642	227.552	227.461	227.395	Normalized for per kWh level
Edelenbosch et al.	2018	LIB	Endogeneous, market leaders, total battery cost										151.959	134.955	129.545	129.178	128.807	128.433	128.056	127.674	127.29	126.901	126.509	126.114	125.714	125.837	125.962	126.087	126.214	126.341	126.348	126.355	126.361	126.368	126.375	126.382	126.389	126.396	126.403	126.41	126.418	126.425	126.432	126.44	126.447	Normalized for per kWh level
Edelenbosch et al.	2018	LIB	Endogeneous, optimistic, total battery cost										151.959	134.955	123.636	116.598	114.518	111.866	110.764	108.558	106.145	104.296	102.547	100.379	99.8095	99.5694	99.1346	97.9952	98.1311	97.7561	97.3284	96.0099	95.5446	94.6766	94.65	94.1809	93.7071	93.2284	92.7449	92.2564	91.7629	91.2642	90.7604	90.2513	89.7368	Normalized for per kWh level
Safoutin et al.	2018	LIB	BEV200 pack cost, lower boundary																	120																										Extracted from article text S.11
Safoutin et al.	2018	LIB	BEV200 pack cost, upper boundary																	150																										Extracted from article text S.11
Comello and Reichelstein	2019	LIB	Average Scenario											171.04	157.08	144.271	132.616	122.004																												Extracted from Supplementary Figure 1
Comello and Reichelstein	2019	LIB	Minimum											140	124	110	97	86																												Extracted from Supplementary Figure 1
Comello and Reichelstein	2019	LIB	Maximum											200	190	181	173	164																												Extracted from Supplementary Figure 1
Nykvist et al.	2019	LIB	2016 best cost estimate and average LR											165	150	137	125	116	109	100	94	88	82	77	72																					Measured from Figure 3
Nykvist et al.	2019	LIB	high cost estimate											218	214	190	179	169	160	152	144	137	131	125	119																					Measured from Figure 3
Nykvist et al.	2019	LIB	low cost estimate											125	110	98	88	80	73	67	61	56	52	47	43																					Measured from Figure 3
Schmidt et al.	2019	LIB	Lithium-Ion (EV), central experience rate											198	181	168	156	145	135	125	116	108	100	92	86	79.3962	73.8894	69.0368	64.8023	61.1317	57.9601	55.22	52.8467	50.7817	49	47.3823	45.9699	44.7085	43.5743	42.5481	41.6142	40.7595	39.9735	39.2473	39	Extracted from Supplementary Materials Figure 3
Schmidt et al.	2019	LIB	Lithium-Ion (EV), high experience rate											185.231	165.384	149.572	136.163	124.297	113.497	103.511	94.221	85.5939	77.6423	70.396	63.8805	58.1037	53.0495	48.6778	44.929	41.7316	39.0097	36.6898	34.7049	32.997	31.5174	30.2258	29.0897	28.0828	27.184	26.376	25.6452	24.9802	24.3719	23.8127	23.2964	Extracted from Supplementary Materials Figure 3
Schmidt et al.	2019	LIB	Lithium-Ion (EV), low experience rate											214.944	202.353	192.048	183.131	175.087	167.598	160.46	153.548	146.793	140.168	133.681	127.366	121.27	115.449	109.955	104.834	100.115	95.8135	91.9285	88.444	85.3332	82.5626	80.0958	77.8963	75.9296	74.1646	72.5738	71.1332	69.8225	68.6243	67.5239	66.509	Extracted from Supplementary Materials Figure 3
Hsieh et al.	2019	LIB	EV, two-stage learning curve base case											209	191	176	165	155	149	143	138	132	128	126	124																					Measured from Figure 3
Hsieh et al.	2019	LIB	EV, two-stage learning curve upper bound											219	200	186	178	166	162	155	151	148	145	145	141																					Measured from Figure 3
Hsieh et al.	2019	LIB	EV, two-stage learning curve lower bound											195	174	162	148	138	129	120	112	107	102	98	93																					Measured from Figure 3
Mongird et al.	2020	LIB	LIB, pack										271							189																										Extracted from Table 7, Table 12, article text p. 15
Beuse et al.	2020	LIB	LIB, current raw material cost									316													110																					Extracted from Figure 6
Beuse et al.	2020	LIB	LIB, high raw material cost									316													157																					Extracted from Figure 6
Penisa et al.	2020	LIB	2-factor, cum. production, cum. PCT patents												151	132	117	105	92	84																										Measured from Figure 5
Penisa et al.	2020	LIB	1-factor, cum. Production												186	162	148	135	126	115																										Measured from Figure 4
Penisa et al.	2020	LIB	1-factor, cum. PCT patents												224	209	195	186	174	164																										Measured from Figure 4
Penisa et al.	2020	LIB	4-factor												174	166	148	138	129	120																										Measured from Figure 5
He et al.	2020	LIB	High battery cost scenario												154	151	148	145	142	139	136	133	130	127	124	123.3	122.6	121.9	121.2	120.5	119.8	119.1	118.4	117.7	117	116.3	115.6	114.9	114.2	113.5	112.8	112.1	111.4	110.7	110	Measured from Supplementary Figure 5
He et al.	2020	LIB	Reference battery cost scenario												147	142	136	132	127	123	118	115	111	107	104	101	98	95	93	91	89.3	87.6	85.9	84.2	82.6	81.7	81	80.3	79.6	78.7	78	77.3	76.6	75.8	75	Measured from Supplementary Figure 5
He et al.	2020	LIB	Low battery cost scenario												146	137	128	121	114	107	102	96	92	87	83	80	77	75	74	73	72.2	71.4	70.6	69.8	69	68.8	68.6	68.4	68.2	68	67.8	67.6	67.4	67.2	67	Measured from Supplementary Figure 5
BloombergNEF	2019	LIB	Volume-weighted average price		1160	899	707																																							https://about.bnef.com/blog/behind-scenes-take-lithium-ion-battery-prices/
Bloomberg NEF	2020	LIB	Volume-weighted average price					668	592	384	295	221	181	157	137																															https://about.bnef.com/blog/battery-pack-prices-cited-below-100-kwh-for-the-first-time-in-2020-while-market-average-sits-at-137-kwh/

## Sheet: Conversion rates
Exchange rates
Year	USD/EUR	CNY/USD		Source
2010	1.32609	6.7696		Federal Reserve (https://www.federalreserve.gov/datadownload/Download.aspx?rel=H10&series=60f32914ab61dfab590e0e470153e3ae&filetype=spreadsheetml&label=include&layout=seriescolumn&from=01/01/2010&to=12/19/2020)
2011	1.39313	6.46302
2012	1.28587	6.30926
2013	1.32814	6.14775
2014	1.32967	6.16199
2015	1.10961	6.28274
2016	1.10719	6.64002
2017	1.13005	6.75687
2018	1.1817	6.60904
2019	1.11942	6.90814
Conversion rates	Multiplier			Source
Cell to Pack	1.3089			Kittner, N., Lill, F. & Kammen, D. M. Energy storage deployment and innovation for the clean energy transition. Nat. Energy 2, 17125 (2017).
Material to Cell	1.3351			Kwade, A. et al. Current status and challenges for automotive battery production technologies. Nat. Energy 3, 290–300 (2018).
Electrode stack to Material	1.1614			Kwade, A. et al. Current status and challenges for automotive battery production technologies. Nat. Energy 3, 290–300 (2018).
